# Supplementary material for: Ca2+ determines the entropy changes associated with the formation of transition states during water oxidation by Photosystem II
Source: Royal Society of Chemistry journal article supplement (doi:10.1039/c1ee01408k), 2011-01-01

## Supporting information

# Ca<sup>2+</sup> determines the entropy changes associated with the formation of transition states during water oxidation by Photosystem II.

Fabrice Rappaport,<sup>†</sup> Naoko Ishida,<sup>‡</sup> Miwa Sugiura,<sup>⊥</sup> and Alain Boussac<sup>‡</sup>

<sup>†</sup>IBPC, UMR 7141 CNRS and Université Pierre et Marie Curie, 13 rue Pierre et Marie Curie, 75005 Paris, France.

<sup>‡</sup>iBiTec-S, CNRS URA 2096, CEA Saclay, 91191 Gif-sur-Yvette, France.

<sup>⊥</sup>Cell-Free Science and Technology Research Center, Ehime University, Bunkyo-cho, Matsuyama Ehime, 790-8577, Japan.

CORRESPONDING AUTHORS [Fabrice.rappaport@ibpc.fr](mailto:Fabrice.rappaport@ibpc.fr), [Alain.boussac@cea.fr](mailto:Alain.boussac@cea.fr)

-Figure S1 shows that the cw EPR spectra recorded on the D2 Y60F Ca-PSII and D2 Y160F Sr-PSII used in this study are very similar if not identical to those already published (Low temperature photochemistry in Photosystem II from *Thermosynechococcus elongatus* induced by visible and near-infrared light. Boussac, A., Sugiura, M., Lai, T.-L. and Rutherford, A. W. (2008) *Phil. Trans. R. Soc.* 363, 1203-1210.)

-Figure S2 shows that the frequency domain of the light-*minus*-dark ESEEM data induced by the NIR illumination in the S<sub>3</sub>-state in both D2 Y60F Ca-PSII and D2 Y160F Sr-PSII exhibit only peaks around the Larmor frequency of proton.

-Figure S3 compares the power spectra after Fourier transform of light-*minus*-dark ESEEM data induced by a NIR illumination in the S<sub>3</sub>-state in both D2 Y60F Ca-PSII and D2 Y160F Sr-PSII. The ESEEM data were normalized to the same amplitude before the Fourier transform. This figure shows that the couplings originating from proton(s) are much less pronounced in D2 Y160F Sr-PSII than in D2 Y60F Ca-PSII.

-Figures S4 allows us to compare, as an example, the oscillating pattern at 292 nm and 440-426 nm in WT\* Sr-PSII at 19°C.

-Figure S5 allows us to compare the oscillating pattern at 292 nm in WT\* Sr-PSII at 5°C, 19°C and 40°C. The damping is only very slightly enhanced at 5°C and 40°C.

-Figure S6 shows that the temperature affects similarly the damping in WT\* Sr-PSII and WT\* Ca-PSII.

**Figure S1:**

Figure S1 shows the cw-EPR spectra recorded in D2-Y160F Ca-PSII (Panel A) and D2-Y160F Sr-PSII (Panel B). Spectra were recorded in the  $S_3$ -state (black spectra) and after a further NIR illumination at 820 nm in the EPR cavity at 4 K (red spectra). Shown in blue are the  $(S_3+NIR)$ -minus- $(S_3)$  difference spectra.

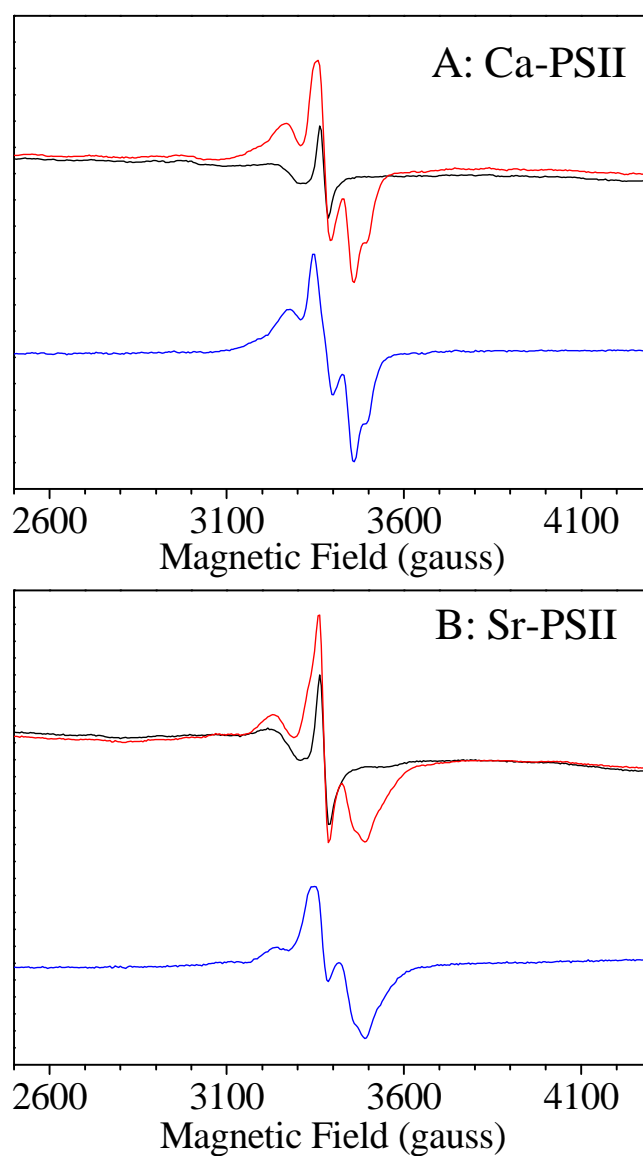

Instrument settings: modulation amplitude, 10 G; microwave power, 20 mW; microwave frequency, 9.4 GHz; modulation frequency, 100 kHz and temperature, 4.2 K. The chlorophyll concentration was 1.1 mg/ml.

**Figure S2:**

Pulse-EPR measurements in D2 Y160F Ca-PSII (Panel A) and D2 Y160F Sr-PSII (Panel B). The spectra are the power spectra of the Fourier transform of the ESEEM data recorded in the  $S_3$ -state (black spectra). The blue spectra are the power spectra of the Fourier transform of the light-*minus*-dark difference ESEEM spectra induced by NIR illumination at 820 nm at 4.2 K in the EPR cavity. ESEEM spectra were measured at 3484 gauss and resulted from a three-pulse sequence  $\pi/2$ - $\tau$ - $\pi/2$ -T- $\pi/2$ -echo with  $\tau = 168$  ns and  $T_{\text{min}} = 64$  ns. Temperature = 4.2 K; microwave frequency, 9.7 GHz. Shot repetition time = 8 ms. The  $\pi/2$  pulses duration was 16 ns. For the ESEEM, 800 points were recorded and T was incremented by 8 ns steps from its initial value (64 ns). Fourier transform of the time domain data was done after: (1) subtraction of a background double exponential function, (2) zero-filling to 1024 points, (3) dead-time reconstruction by simulating peaks in the frequency domain followed by a back Fourier transform to fill the missing data in the dead time, and (4) Fourier transform of the full data (experimental + reconstructed dead time).

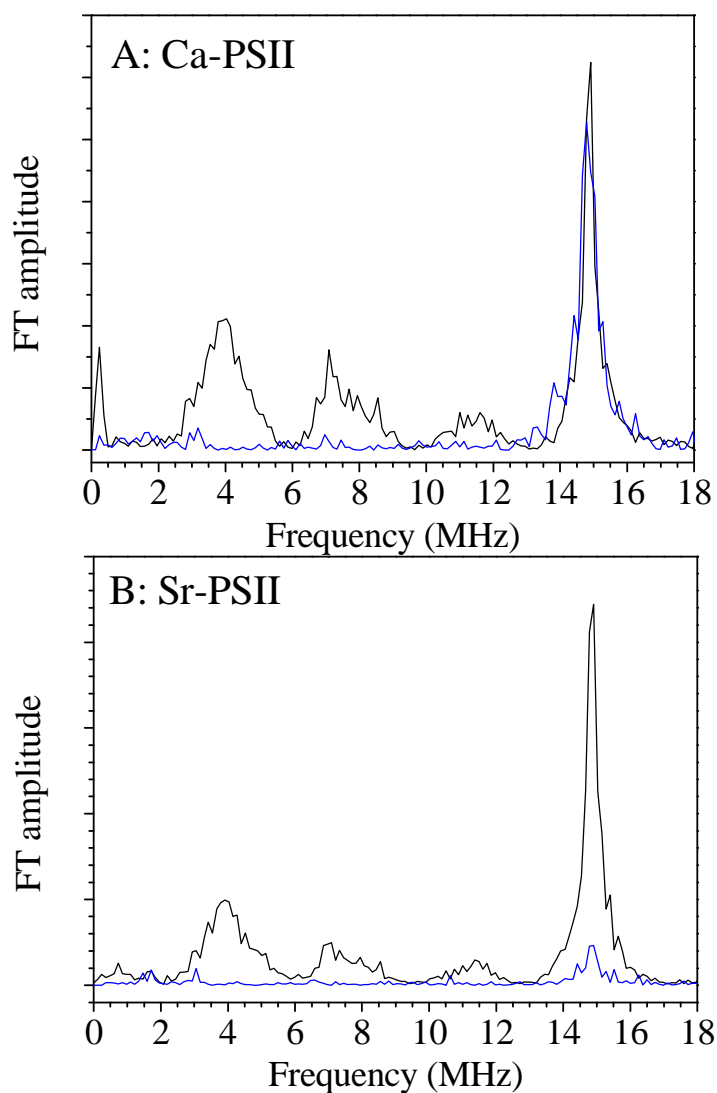

Figure S3:

Pulse-EPR measurements in D2 Y160F Ca-PSII (black spectrum) and D2 Y160F Sr-PSII (Red spectrum). Power spectra of the light-*minus*-dark difference ESEEM spectra Fourier transform shown in Figure S2. Before Fourier transform, the ESEEM data in Ca-PSII and Sr-PSII were normalized to the same amplitude.

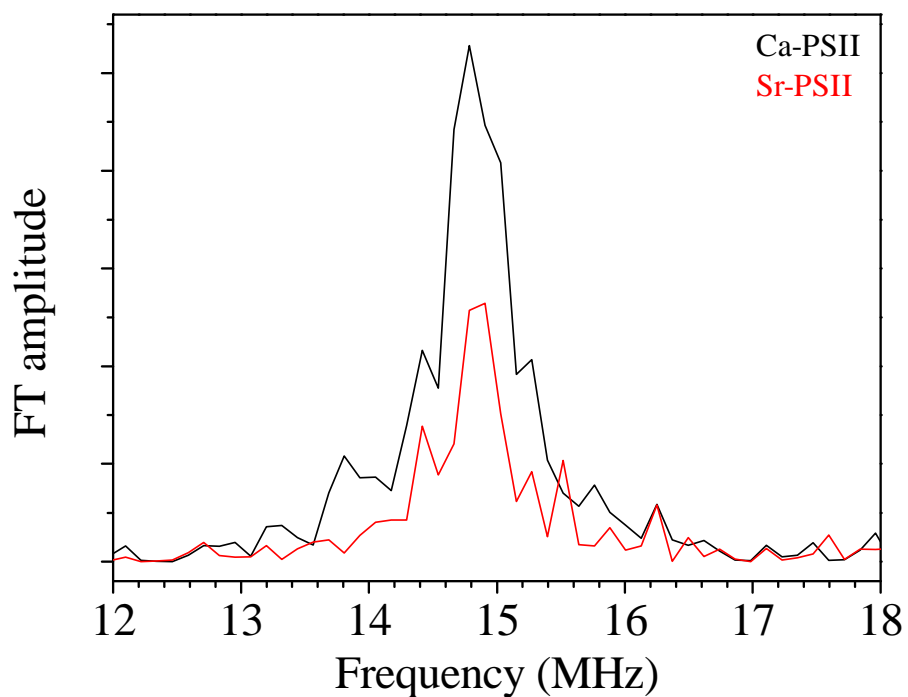

Figure S4:

Sequence of the amplitude of the absorption changes at 292 nm (black) and 440-426 nm (red) in WT\* Sr-PSII. The measurements were done during a series of saturating flashes (spaced 400 ms apart). The samples (Chl = 25 $\mu$ g/ml) were dark-adapted for 1 h at 19°C before the addition of 100  $\mu$ M PPBQ dissolved in DMSO. The measurements were done 200 ms after each flash.

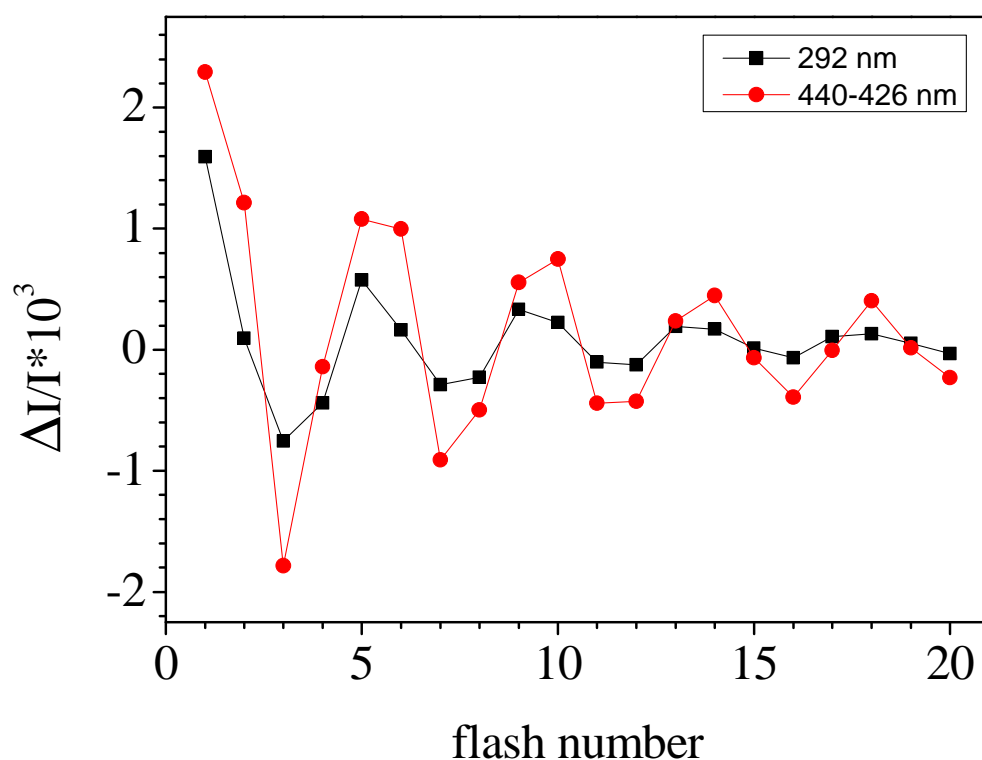

**Figure S5:**

Sequence of the amplitude of the absorption changes at 292 nm in WT\* Sr-PSII at 5°C (black), 19°C (red) and 40°C (blue). The measurements were done during a series of saturating flashes (spaced 400 ms apart) given to WT\* Sr-PSII. The samples (Chl = 25µg/ml) were dark-adapted for 1 h at 19°C before the addition of 100 µM PPBQ dissolved in DMSO. The measurements were done 200 ms after each flash.

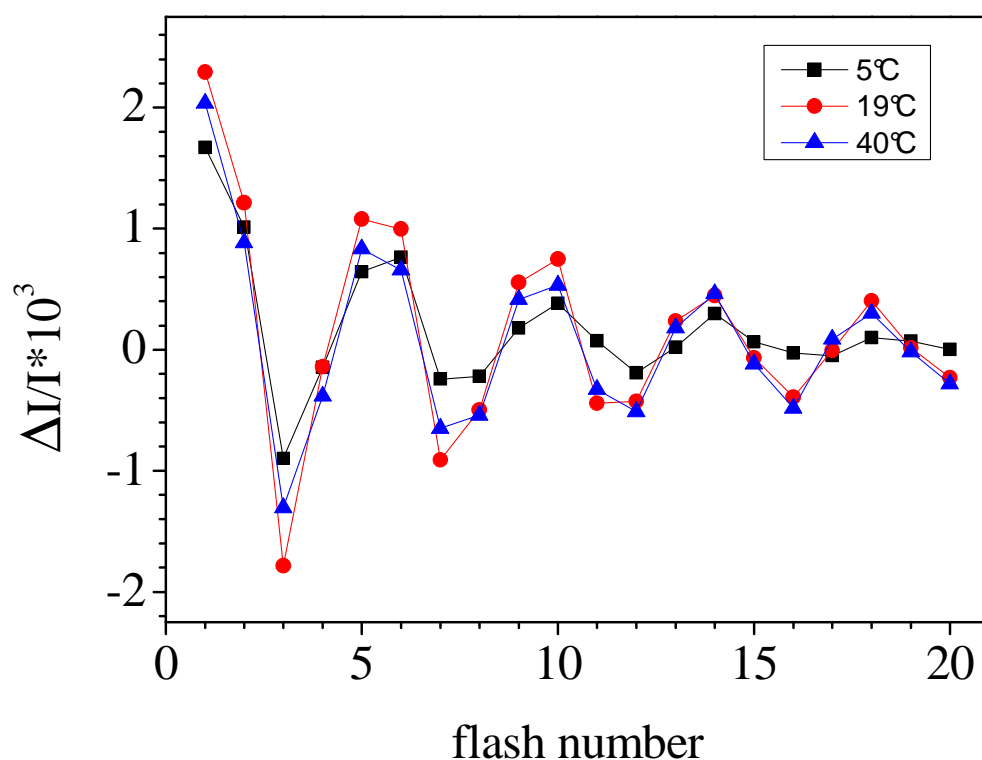

**Figure S6:**

Sequence of the amplitude of the absorption changes at 292 nm at 5°C in WT\* Ca-PSII (black) and WT\* Sr-PSII (red). The measurements were done during a series of saturating flashes (spaced 400 ms apart). The samples (Chl = 25µg/ml) were dark-adapted for 1 h at 19°C before the addition of 100 µM PPBQ dissolved in DMSO. The measurements were done 200 ms after each flash.

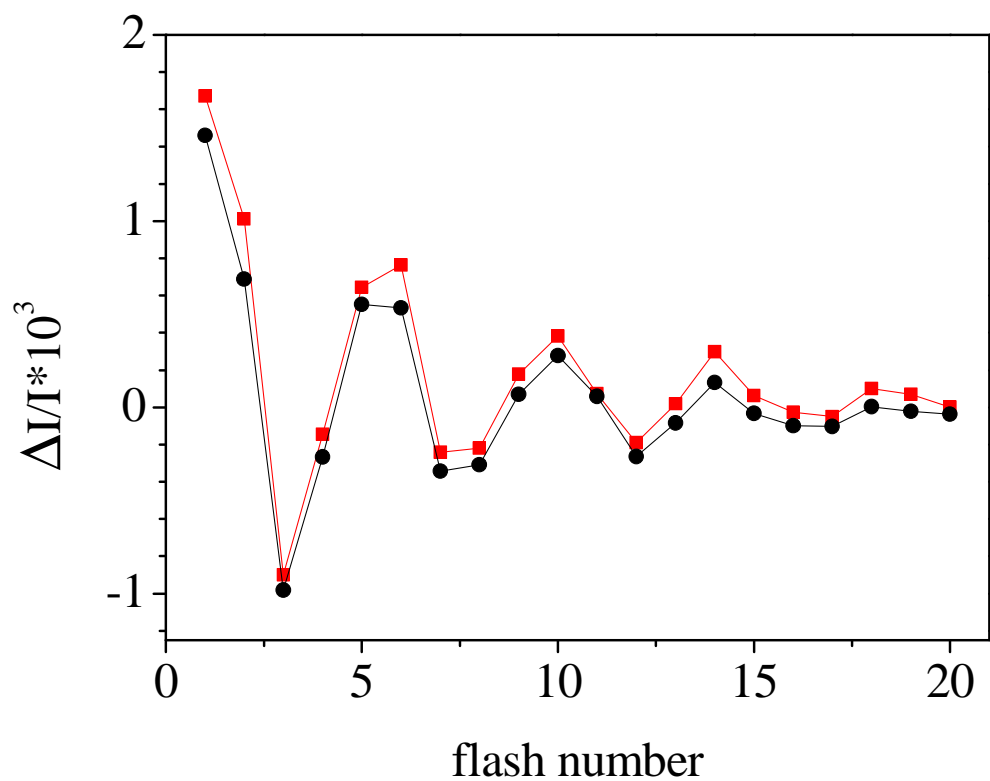

Supplement: c1ee01408k.pdf [file c1ee01408k.pdf]
